# Supplementary material for: Synthesis and structural characterization of tris(2-oxo-1-tert-butylimidazolyl) and tris(2-oxo-1-methylbenzimidazolyl)hydroborato complexes: a new class of tripodal oxygen donor ligand
Source: Royal Society of Chemistry journal article supplement (doi:10.1039/c0cc03943h), 2011-01-01
Supplement: c0cc03943h.pdf [file c0cc03943h.pdf]

## SUPPORTING INFORMATION

**Synthesis and Structural Characterization of  
*Tris*(2-oxo-1-t-butylimidazolyl) and  
*Tris*(2-oxo-1-methylbenzimidazolyl)hydroborato Complexes:  
A New Class of Tripodal Oxygen Donor Ligand**

Ahmed Al-Harbi, Wesley Sattler, Aaron Sattler and Gerard Parkin,\*

*Department of Chemistry,*

*Columbia University,*

*New York, New York 10027, USA.*

*Received xxxx xx, 2010.*

## EXPERIMENTAL SECTION

### General Considerations

All manipulations were performed using a combination of glovebox, high vacuum, and Schlenk techniques under a nitrogen or argon atmosphere unless otherwise specified.<sup>1</sup> Solvents were purified and degassed by standard procedures. <sup>1</sup>H NMR spectra were measured on Bruker 300 DRX, Bruker 300 DPX, Bruker 400 DRX, Bruker 400 AVIII, Bruker 400 Cyber-enabled Avance III and Bruker Avance 500 DMX spectrometers. <sup>1</sup>H NMR chemical shifts are reported in ppm relative to SiMe<sub>4</sub> ( $\delta$  = 0) and were referenced internally with respect to the protio solvent impurity ( $\delta$  7.16 for C<sub>6</sub>D<sub>5</sub>H; 7.26 for CHCl<sub>3</sub> and 2.50 for *d*<sub>6</sub>-DMSO).<sup>2</sup> <sup>13</sup>C NMR spectra are reported in ppm relative to SiMe<sub>4</sub> ( $\delta$  = 0) and were referenced internally with respect to the solvent ( $\delta$  77.16 for CDCl<sub>3</sub>, 128.06 for C<sub>6</sub>D<sub>6</sub>, 54.00 for CD<sub>2</sub>Cl<sub>2</sub> and 39.52 for *d*<sub>6</sub>-DMSO).<sup>2</sup> Coupling constants are given in hertz. Infrared spectra were recorded on Nicolet Avatar 370 DTGS spectrometer and are reported in cm<sup>-1</sup>. Mass spectra were obtained on a Jeol JMS-HX110H Tandem Double-Focusing Mass Spectrometer with a 10 kV accelerated voltage equipped with FAB ion source. 1-*tert*-Butyl-1,3-dihydro-2*H*-imidazol-2-one<sup>3</sup> and 1-methyl-1,3-dihydro-2*H*-benzimidazol-2-one<sup>4</sup> were prepared by the literature methods. NaBH<sub>4</sub> (Aldrich), LiBH<sub>4</sub> (Strem), ZnI<sub>2</sub> (Aldrich), CoCl<sub>2</sub> (Aldrich), FeCl<sub>2</sub> (Strem Chemicals), ZrCl<sub>4</sub> (Aldrich), CpZrCl<sub>3</sub> (Aldrich), Re(CO)<sub>5</sub>Br (Strem Chemicals) and 1-methyl-1,3-dihydro-2*H*-benzimidazol-2-thione (Aldrich) were obtained commercially and used as received.

### X-ray structure determinations

X-ray diffraction data were collected on a Bruker Apex II diffractometer. Crystal data, data collection and refinement parameters are summarized in Table 1. The structures were solved using direct methods and standard difference map techniques, and were refined by full-matrix least-squares procedures on  $F^2$  with SHELXTL (Version 6.1).<sup>5</sup>

## Measurement of Cone Angles

Crystallographic cone angles ( $\Theta$ ) were measured by using the procedure described by Mingos.<sup>6</sup> Specifically, the half-angle ( $\theta_i$ ) for each arm of the ligand is calculated as the maximum value of  $B \cdots M \cdots H$ , where the hydrogen atom position takes into account the van der Waals radius of hydrogen (1.2 Å). The crystallographic cone angle for the ligand is then defined as  $\Theta = (2/3) \sum \theta_i$ .

## Synthesis of $[\text{To}^{\text{MeBenz}}]\text{Na}$

A mixture of 1-methyl-2-benzimidazolinone (700 mg, 4.73 mmol) and  $\text{NaBH}_4$  (51 mg, 1.35 mmol) was placed in an ampoule and treated with diglyme (*ca.* 10 mL). The mixture was heated at 175 °C for 1 week, cooled to room temperature and filtered. The precipitate was washed with pentane (*ca.* 5 mL) and dried *in vacuo*, yielding

$[\text{To}^{\text{MeBenz}}]\text{Na} \cdot \text{diglyme}$  as a white solid (650 mg, 79%). Analysis calcd. for

$[\text{To}^{\text{MeBenz}}]\text{Na} \cdot \text{diglyme}$ : C, 59.0%; H, 5.9%; N 13.8%. Found: C, 58.8%; H, 4.9%; N 14.6%.

$^1\text{H}$  NMR ( $\text{C}_6\text{D}_6$ ): 2.74 [s, 9H of  $\text{HB}\{(\text{C}_4\text{H}_4)\text{C}_2\text{N}_2(\text{CH}_3)\text{CO}\}_3$ ], 3.10 [s, 6H of  $2\text{CH}_3$  for diglyme], 3.30 [t,  $^3J_{\text{H-H}} = 5$ , 4H of  $2\text{CH}_2$  for diglyme], 3.43 [t,  $^3J_{\text{H-H}} = 5$ , 4H of  $2\text{CH}_2$  for diglyme], 5.40 [b, 1H of  $\text{HB}\{(\text{C}_4\text{H}_4)\text{C}_2\text{N}_2(\text{CH}_3)\text{CO}\}_3$ ], 6.54 [d,  $^3J_{\text{H-H}} = 7$ , 3H of  $\text{HB}\{(\text{C}_4\text{H}_4)\text{C}_2\text{N}_2(\text{CH}_3)\text{CO}\}_3$ ], 6.94 [m, 6H of  $\text{HB}\{(\text{C}_4\text{H}_4)\text{C}_2\text{N}_2(\text{CH}_3)\text{CO}\}_3$ ], 7.59 [d,  $^3J_{\text{H-H}} = 7$ , 3H of  $\text{HB}\{(\text{C}_4\text{H}_4)\text{C}_2\text{N}_2(\text{CH}_3)\text{CO}\}_3$ ].  $^{13}\text{C}\{^1\text{H}\}$  NMR ( $\text{C}_6\text{D}_6$ ): 26.2 [3 C,  $\text{HB}\{(\text{C}_4\text{H}_4)\text{C}_2\text{N}_2(\text{CH}_3)\text{CO}\}_3$ ], 58.7 [2 C, methyl of the diglyme], 70.6 [2 C, methylene of the diglyme], 72.0 [2 C, methylene of the diglyme], 106.9 [3 C,  $\text{HB}\{(\text{C}_4\text{H}_4)\text{C}_2\text{N}_2(\text{CH}_3)\text{CO}\}_3$ ], 111.8 [3 C,  $\text{HB}\{(\text{C}_4\text{H}_4)\text{C}_2\text{N}_2(\text{CH}_3)\text{CO}\}_3$ ], 120.4 [3 C,  $\text{HB}\{(\text{C}_4\text{H}_4)\text{C}_2\text{N}_2(\text{CH}_3)\text{CO}\}_3$ ], 121.6 [3 C,  $\text{HB}\{(\text{C}_4\text{H}_4)\text{C}_2\text{N}_2(\text{CH}_3)\text{CO}\}_3$ ], 131.9 [3 C,  $\text{HB}\{(\text{C}_4\text{H}_4)\text{C}_2\text{N}_2(\text{CH}_3)\text{CO}\}_3$ ], 134.8 [3 C,  $\text{HB}\{(\text{C}_4\text{H}_4)\text{C}_2\text{N}_2(\text{CH}_3)\text{CO}\}_3$ ], 159.7 [3 C,  $\text{HB}\{(\text{C}_4\text{H}_4)\text{C}_2\text{N}_2(\text{CH}_3)\text{CO}\}_3$ ]. FAB-MS:  $m/z = 476.3$   $[\text{M}]^+$ ,  $\text{M} = [\text{To}^{\text{MeBenz}}]\text{Na}$ . IR Data (KBr disk,  $\text{cm}^{-1}$ ): 3424 (br), 3054 (w), 2931 (m), 2887 (m), 2425 (w) [ $\nu_{\text{BH}}$ ], 1699 (s), 1674 (s), 1602 (m), 1544 (w), 1495 (s), 1433 (s), 1390 (s), 1377 (s), 1316 (m), 1299 (s), 1212 (m), 1160 (m), 1121 (s), 1088 (s), 1017 (m), 853 (m), 768 (s), 736 (s),

693 (m), 669 (w), 620 (m), 564 (m), 511 (m), 445 (m). Colorless blocks of  $[\text{To}^{\text{MeBenz}}]\text{Na}\cdot\text{diglyme}$  suitable for X-ray were obtained from diglyme.

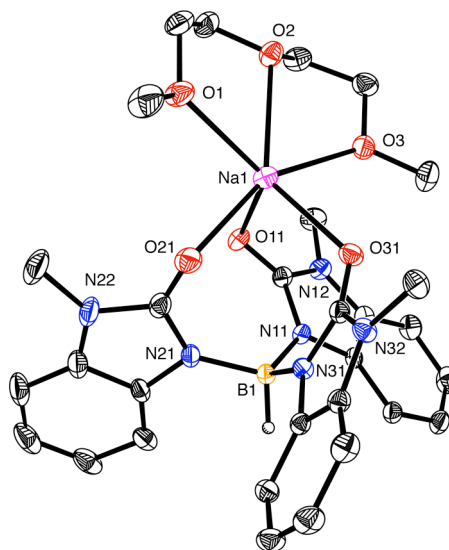

Molecular Structure of  $[\text{To}^{\text{MeBenz}}]\text{Na}\cdot\text{diglyme}$

### Synthesis of $[\text{To}^{\text{MeBenz}}]\text{ZnI}$

A mixture of  $[\text{To}^{\text{MeBenz}}]\text{Na}\cdot\text{diglyme}$  (40 mg, 0.07 mmol) and  $\text{ZnI}_2$  (21 mg, 0.07 mmol) was treated with dichloromethane (*ca.* 8 mL) resulting in the immediate deposition of a white precipitate. The mixture was stirred for *ca.* 4 hours at room temperature, allowed to settle and then filtered. The filtrate was concentrated to *ca.* 3 mL and treated with pentane (*ca.* 10 mL), thereby resulting in the formation of a precipitate. The mixture was filtered and the volatile components were removed from the filtrate *in vacuo* to give  $[\text{To}^{\text{MeBenz}}]\text{ZnI}$  as white powder (20 mg, 47%). Crystals of composition

$[\text{To}^{\text{MeBenz}}]\text{ZnI}\cdot\text{CH}_2\text{Cl}_2$  suitable for X-ray diffraction were obtained from a solution in dichloromethane. Analysis calcd. for  $[\text{To}^{\text{MeBenz}}]\text{ZnI}\cdot\text{CH}_2\text{Cl}_2$ : C, 41.1%; H, 3.3%; N, 11.5%.

Found: C, 41.7%; H, 3.1%; N 11.1.  $^1\text{H}$  NMR ( $\text{C}_6\text{D}_6$ ): 2.48 [s, 9H of

$\text{HB}\{(\text{C}_4\text{H}_4)\text{C}_2\text{N}_2(\text{CH}_3)\text{CO}\}_3$ ], 6.37 [d,  $^3J_{\text{H-H}} = 8$ , 3H of  $\text{HB}\{(\text{C}_4\text{H}_4)\text{C}_2\text{N}_2(\text{CH}_3)\text{CO}\}_3$ ], 6.88 – 7.00 [m, 6H of  $\text{HB}\{(\text{C}_4\text{H}_4)\text{C}_2\text{N}_2(\text{CH}_3)\text{CO}\}_3$ ], 7.60 [d,  $^3J_{\text{H-H}} = 8$ , 3H of  $\text{HB}\{(\text{C}_4\text{H}_4)\text{C}_2\text{N}_2(\text{CH}_3)\text{CO}\}_3$ ].

$^{13}\text{C}\{^1\text{H}\}$  NMR ( $\text{C}_6\text{D}_6$ ): 26.6 [9 C,  $\text{HB}\{(\text{C}_4\text{H}_4)\text{C}_2\text{N}_2(\text{CH}_3)\text{CO}\}_3$ ], 109.0 [3 C,

$\text{HB}\{(\text{C}_4\text{H}_4)\text{C}_2\text{N}_2(\text{CH}_3)\text{CO}\}_3$ ], 112.4 [3 C,  $\text{HB}\{(\text{C}_4\text{H}_4)\text{C}_2\text{N}_2(\text{CH}_3)\text{CO}\}_3$ ], 122.1 [3 C,

$\text{HB}\{(\text{C}_4\text{H}_4)\text{C}_2\text{N}_2(\text{CH}_3)\text{CO}\}_3$ ], 122.6 [3C,  $\text{HB}\{(\text{C}_4\text{H}_4)\text{C}_2\text{N}_2(\text{CH}_3)\text{CO}\}_3$ ], 131.3 [3C,

$\text{HB}\{(\text{C}_4\text{H}_4)\text{C}_2\text{N}_2(\text{CH}_3)\text{CO}\}_3$ , 133.3[3C,  $\text{HB}\{(\text{C}_4\text{H}_4)\text{C}_2\text{N}_2(\text{CH}_3)\text{CO}\}_3$ ], [3C,  $\text{HB}\{(\text{C}_4\text{H}_4)\text{C}_2\text{N}_2(\text{CH}_3)\text{CO}\}_3$ ] not observed.

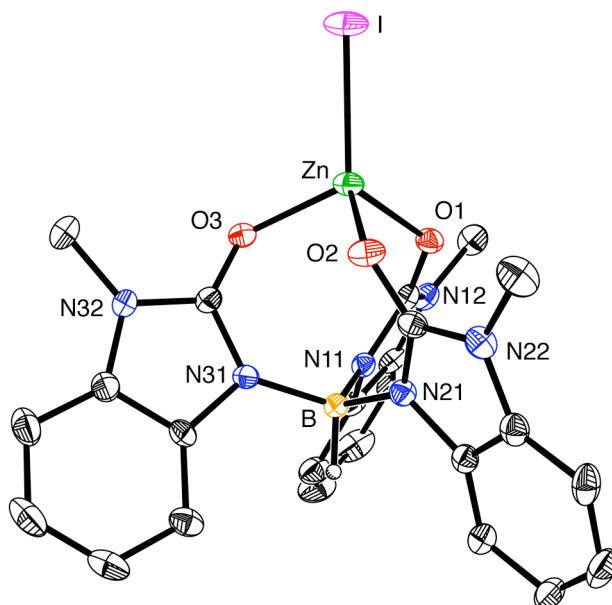

Molecular Structure of  $[\text{To}^{\text{MeBenz}}]\text{ZnI}$

### Synthesis of $[\text{To}^{\text{MeBenz}}]_2\text{Co}$

A mixture of  $[\text{To}^{\text{MeBenz}}]\text{Na}\cdot\text{diglyme}$  (40 mg, 0.07 mmol) and  $\text{CoCl}_2$  (4 mg, 0.03 mmol) was placed in an ampoule, treated with dichloromethane (*ca.* 5 mL) and heated overnight at 60 °C. After this period, the volatile components were removed *in vacuo* and the solid residue was washed sequentially with hexane (*ca.* 3 mL) and acetonitrile (*ca.* 5 mL). The residue was extracted into warm chloroform ( $2 \times \text{ca. } 5 \text{ mL}$ ) and the volatile components were removed from the extract *in vacuo* to give  $[\text{To}^{\text{MeBenz}}]_2\text{Co}$  as a lilac powder (20 mg, 67%). Crystals suitable for X-ray diffraction were obtained from a solution in chloroform. Analysis calcd.  $[\text{To}^{\text{MeBenz}}]_2\text{Co}$ : C, 59.7%; H, 4.6%; N, 17.4%. Found: C, 59.3%; H, 4.1%; N, 16.1 %.  $\mu_{\text{eff}}$  (Evans Method, room temperature): 5.5  $\mu_{\text{B}}$ .  $^1\text{H}$  NMR ( $\text{CDCl}_3$ ): -7.01 [s, 18H of  $\text{HB}\{(\text{C}_4\text{H}_4)\text{C}_2\text{N}_2(\text{CH}_3)\text{CO}\}_3$ ], 2.07 [d,  $^3J_{\text{H-H}} = 7$ , 6H of  $\text{HB}\{(\text{C}_4\text{H}_4)\text{C}_2\text{N}_2(\text{CH}_3)\text{CO}\}_3$ ], 6.72 [t,  $^3J_{\text{H-H}} = 7$ , 6H of  $\text{HB}\{(\text{C}_4\text{H}_4)\text{C}_2\text{N}_2(\text{CH}_3)\text{CO}\}_3$ ], 8.67 [d,  $^3J_{\text{H-H}} = 7$ , 6H of  $\text{HB}\{(\text{C}_4\text{H}_4)\text{C}_2\text{N}_2(\text{CH}_3)\text{CO}\}_3$ ], 16.75 [t,  $^3J_{\text{H-H}} = 7$ , 3H of  $\text{HB}\{(\text{C}_4\text{H}_4)\text{C}_2\text{N}_2(\text{CH}_3)\text{CO}\}_3$ ]. FAB-MS:  $m/z = 965.3$   $[\text{M}]^+$ ,  $\text{M} = [\text{To}^{\text{MeBenz}}]_2\text{Co}$ . IR Data (KBr disk,  $\text{cm}^{-1}$ ): 3446 (br), 3054 (w), 2927 (m), 2855 (w), 2426 (w) [ $\nu_{\text{BH}}$ ], 2228 (w), 1629 (s),

1601 (s), 1544 (w), 1494 (s), 1440 (m), 1397 (m), 1300 (m), 1223 (m), 1148 (m), 1124 (m),  
1095 (m), 1013 (w), 996 (w), 847 (m), 771 (m), 735 (m).

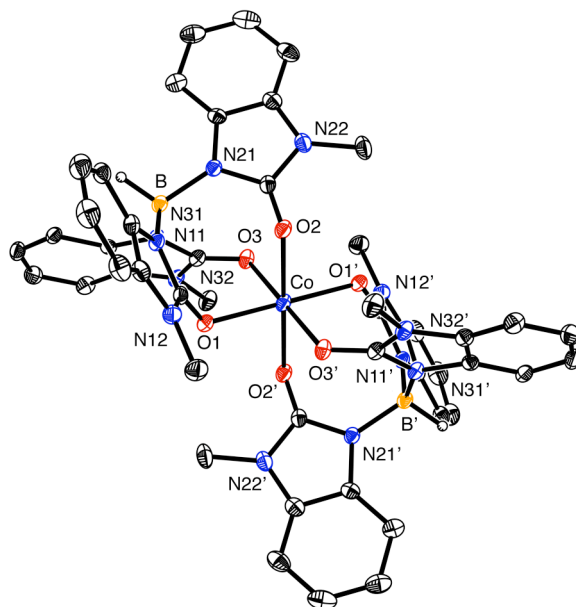

Molecular Structure of  $[\text{To}^{\text{MeBenz}}]_2\text{Co}$

### Synthesis of $[\text{To}^{\text{MeBenz}}]_2\text{Fe}$

A mixture of  $[\text{To}^{\text{MeBenz}}]\text{Na}\cdot\text{diglyme}$  (50 mg, 0.08 mmol) and  $\text{FeCl}_2$  (5 mg, 0.04 mmol) was placed in an ampoule, treated with chloroform (*ca.* 5 mL) and heated overnight at 60 °C. After this period, the volatile components were removed *in vacuo* and the solid residue was washed sequentially with hexane (*ca.* 5 mL) and acetonitrile (*ca.* 5 mL). The residue was extracted into warm chloroform ( $2 \times \text{ca. 5 mL}$ ) and the volatile components were removed from the extract *in vacuo* to give  $[\text{To}^{\text{MeBenz}}]_2\text{Fe}$  as a very pale powder (24 mg, 61%). Crystals suitable for X-ray diffraction were obtained from a solution in chloroform.  $\mu_{\text{eff}}$  (Evans Method, room temperature):  $3.8 \mu_{\text{B}}$ .  $^1\text{H}$  NMR ( $\text{CDCl}_3$ ): -23.3 [s, 18H of  $\text{HB}\{(\text{C}_4\text{H}_4)\text{C}_2\text{N}_2(\text{CH}_3)\text{CO}\}_3$ ], 0.5 [br, 6H of  $\text{HB}\{(\text{C}_4\text{H}_4)\text{C}_2\text{N}_2(\text{CH}_3)\text{CO}\}_3$ ], 7.4 [br, 6H of  $\text{HB}\{(\text{C}_4\text{H}_4)\text{C}_2\text{N}_2(\text{CH}_3)\text{CO}\}_3$ ], 11.9 [br, 6H of  $\text{HB}\{(\text{C}_4\text{H}_4)\text{C}_2\text{N}_2(\text{CH}_3)\text{CO}\}_3$ ], 25.7 [br, 6H of  $\text{HB}\{(\text{C}_4\text{H}_4)\text{C}_2\text{N}_2(\text{CH}_3)\text{CO}\}_3$ ]. FAB-MS:  $m/z = 962.3 [\text{M}]^+$ ,  $\text{M} = [\text{To}^{\text{MeBenz}}]_2\text{Fe}$ . IR Data (KBr disk,  $\text{cm}^{-1}$ ): 3450 (br), 2923 (m), 2848 (w), 2434 (w) [ $\nu_{\text{BH}}$ ], 1637 (s), 1629 (s), 1601 (m), 1544

(w), 1510 (w), 1493 (m), 1440 (m), 1397 (m), 1299 (w), 1219 (w), 1152 (w), 1124 (m), 1094 (w), 1014 (w), 844 (w), 769 (m), 735 (m).

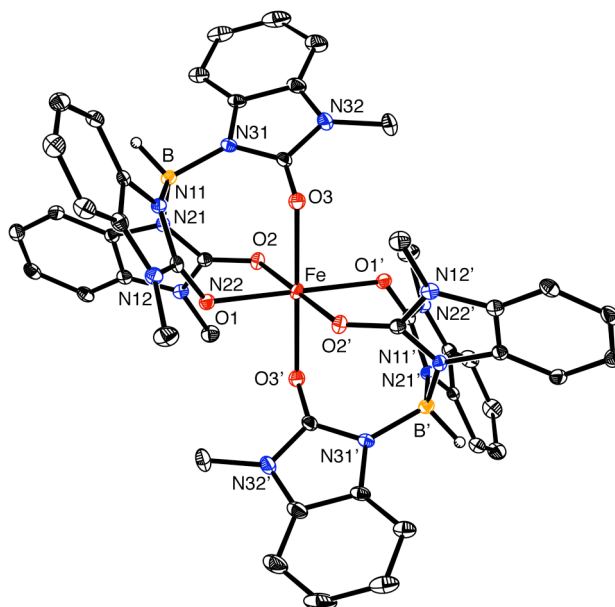

Molecular Structure of  $[\text{To}^{\text{MeBenz}}]_2\text{Fe}$

### Synthesis of $[\text{To}^{\text{MeBenz}}]\text{Re}(\text{CO})_3$

A mixture of  $[\text{To}^{\text{MeBenz}}]\text{Na}\cdot\text{diglyme}$  (40 mg, 0.07 mmol) and  $\text{Re}(\text{CO})_5\text{Br}$  (27 mg, 0.07 mmol) was placed in an ampoule, treated with benzene (*ca.* 5 mL) and heated overnight at 70 °C. The reaction mixture was filtered and the volatile components were removed from the filtrate *in vacuo*. The residue obtained was washed with acetonitrile (*ca.* 5 mL) to give  $[\text{To}^{\text{MeBenz}}]\text{Re}(\text{CO})_3$  as white powder (24 mg, 50%). Analysis calcd. for  $[\text{To}^{\text{MeBenz}}]\text{Re}(\text{CO})_3$ : C, 44.8%; H, 3.1%; N 11.6%. Found: C, 44.6%; H, 3.2%; N 11.4%.  $^1\text{H}$  NMR ( $\text{C}_6\text{D}_6$ ): 2.81 [s, 9H of  $\text{HB}\{(\text{C}_4\text{H}_4)\text{C}_2\text{N}_2(\text{CH}_3)\text{CO}\}_3$ ], 6.37 [d,  $^3J_{\text{H-H}} = 8$ , 3H of  $\text{HB}\{(\text{C}_4\text{H}_4)\text{C}_2\text{N}_2(\text{CH}_3)\text{CO}\}_3$ ], 6.88 [t,  $^3J_{\text{H-H}} = 8$ , 3H of  $\text{HB}\{(\text{C}_4\text{H}_4)\text{C}_2\text{N}_2(\text{CH}_3)\text{CO}\}_3$ ], 6.99 [t,  $^3J_{\text{H-H}} = 8$ , 3H of  $\text{HB}\{(\text{C}_4\text{H}_4)\text{C}_2\text{N}_2(\text{CH}_3)\text{CO}\}_3$ ], 7.57 [d,  $^3J_{\text{H-H}} = 8$ , 3H of  $\text{HB}\{(\text{C}_4\text{H}_4)\text{C}_2\text{N}_2(\text{CH}_3)\text{CO}\}_3$ ].  $^{13}\text{C}\{^1\text{H}\}$  NMR ( $\text{C}_6\text{D}_6$ ): 27.0 [3 C,  $\text{HB}\{(\text{C}_4\text{H}_4)\text{C}_2\text{N}_2(\text{CH}_3)\text{CO}\}_3$ ], 109.1 [3 C,  $\text{HB}\{(\text{C}_4\text{H}_4)\text{C}_2\text{N}_2(\text{CH}_3)\text{CO}\}_3$ ], 112.2 [3 C,  $\text{HB}\{(\text{C}_4\text{H}_4)\text{C}_2\text{N}_2(\text{CH}_3)\text{CO}\}_3$ ], 122.1 [3 C,  $\text{HB}\{(\text{C}_4\text{H}_4)\text{C}_2\text{N}_2(\text{CH}_3)\text{CO}\}_3$ ], 122.7 [3C,  $\text{HB}\{(\text{C}_4\text{H}_4)\text{C}_2\text{N}_2(\text{CH}_3)\text{CO}\}_3$ ], 131.2

[HB{(C<sub>4</sub>H<sub>4</sub>)C<sub>2</sub>N<sub>2</sub>(CH<sub>3</sub>)CO}<sub>3</sub>], 132.8 [HB{(C<sub>4</sub>H<sub>4</sub>)C<sub>2</sub>N<sub>2</sub>(CH<sub>3</sub>)CO}<sub>3</sub>], 161.0

[HB{(C<sub>4</sub>H<sub>4</sub>)C<sub>2</sub>N<sub>2</sub>(CH<sub>3</sub>)CO}<sub>3</sub>]. FAB-MS: *m/z* = 724.1 [M]<sup>+</sup>, M = [To<sup>MeBenz</sup>]Re(CO)<sub>3</sub>. IR Data (KBr disk, cm<sup>-1</sup>): 2938 (w), 2457(w) [ν<sub>BH</sub>], 2022 (s) [ν<sub>CO</sub>], 1911 (s) [ν<sub>CO</sub>], 1637 (s), 1588 (s), 1490 (m), 1448 (m), 1399 (m), 1302 (w), 1232 (w), 1158 (w), 1126 (w), 1099 (w), 764 (w). IR Data (CH<sub>2</sub>Cl<sub>2</sub>, cm<sup>-1</sup>): 2026 (m) [ν<sub>CO</sub>], 1894 (s) [ν<sub>CO</sub>].

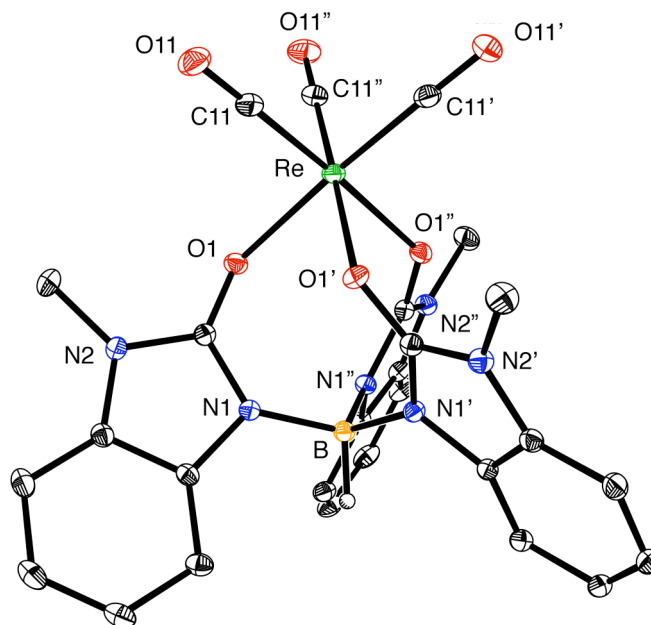

Molecular Structure of [To<sup>MeBenz</sup>]Re(CO)<sub>3</sub>

### Synthesis of [To<sup>MeBenz</sup>]ZrCl<sub>3</sub>

A mixture of [To<sup>MeBenz</sup>]Na•diglyme (40 mg, 0.07 mmol) and ZrCl<sub>4</sub> (18 mg, 0.08 mmol) was placed in an ampoule and treated with dichloromethane (*ca.* 6 mL) and heated overnight at 50 °C. After this period, the mixture was filtered and the volatile components were removed from the filtrate *in vacuo*. The solid residue was washed with acetonitrile (*ca.* 3 mL) and hexane (*ca.* 3 mL) to yield [To<sup>MeBenz</sup>]ZrCl<sub>3</sub> as a white powder (14 mg, 33%). <sup>1</sup>H NMR (C<sub>6</sub>D<sub>6</sub>): 2.96 [s, 9H of HB{(C<sub>4</sub>H<sub>4</sub>)C<sub>2</sub>N<sub>2</sub>(CH<sub>3</sub>)CO}<sub>3</sub>], 6.33 [d, <sup>3</sup>J<sub>H-H</sub> = 8, 3H of HB{(C<sub>4</sub>H<sub>4</sub>)C<sub>2</sub>N<sub>2</sub>(CH<sub>3</sub>)CO}<sub>3</sub>], 6.85 [t, <sup>3</sup>J<sub>H-H</sub> = 8, 3H of HB{(C<sub>4</sub>H<sub>4</sub>)C<sub>2</sub>N<sub>2</sub>(CH<sub>3</sub>)CO}<sub>3</sub>], 7.00 [t, <sup>3</sup>J<sub>H-H</sub> = 8, 3H of HB{(C<sub>4</sub>H<sub>4</sub>)C<sub>2</sub>N<sub>2</sub>(CH<sub>3</sub>)CO}<sub>3</sub>], 7.56 [d, <sup>3</sup>J<sub>H-H</sub>



= 8, 3H of HB{(C<sub>4</sub>H<sub>4</sub>)C<sub>2</sub>N<sub>2</sub>(CH<sub>3</sub>)CO}<sub>3</sub>}. <sup>13</sup>C{<sup>1</sup>H} NMR (CDCl<sub>3</sub>): 28.9 [3 C, HB{(C<sub>4</sub>H<sub>4</sub>)C<sub>2</sub>N<sub>2</sub>(CH<sub>3</sub>)CO}<sub>3</sub>], 109.8 [3 C, HB{(C<sub>4</sub>H<sub>4</sub>)C<sub>2</sub>N<sub>2</sub>(CH<sub>3</sub>)CO}<sub>3</sub>], 113.2 [3 C, HB{(C<sub>4</sub>H<sub>4</sub>)C<sub>2</sub>N<sub>2</sub>(CH<sub>3</sub>)CO}<sub>3</sub>], 123.5 [3 C, HB{(C<sub>4</sub>H<sub>4</sub>)C<sub>2</sub>N<sub>2</sub>(CH<sub>3</sub>)CO}<sub>3</sub>], 123.7 [3C, HB{(C<sub>4</sub>H<sub>4</sub>)C<sub>2</sub>N<sub>2</sub>(CH<sub>3</sub>)CO}<sub>3</sub>], 128.5 [3 C, HB{(C<sub>4</sub>H<sub>4</sub>)C<sub>2</sub>N<sub>2</sub>(CH<sub>3</sub>)CO}<sub>3</sub>], 130.7 [3 C, HB{(C<sub>4</sub>H<sub>4</sub>)C<sub>2</sub>N<sub>2</sub>(CH<sub>3</sub>)CO}<sub>3</sub>], [3 C, HB{(C<sub>4</sub>H<sub>4</sub>)C<sub>2</sub>N<sub>2</sub>(CH<sub>3</sub>)CO}<sub>3</sub>] not observed. <sup>13</sup>C{<sup>1</sup>H} NMR (CD<sub>2</sub>Cl<sub>2</sub>): 29.2 [3 C, HB{(C<sub>4</sub>H<sub>4</sub>)C<sub>2</sub>N<sub>2</sub>(CH<sub>3</sub>)CO}<sub>3</sub>], 110.3 [3 C, HB{(C<sub>4</sub>H<sub>4</sub>)C<sub>2</sub>N<sub>2</sub>(CH<sub>3</sub>)CO}<sub>3</sub>], 113.7 [3 C, HB{(C<sub>4</sub>H<sub>4</sub>)C<sub>2</sub>N<sub>2</sub>(CH<sub>3</sub>)CO}<sub>3</sub>], 123.9 [3 C, HB{(C<sub>4</sub>H<sub>4</sub>)C<sub>2</sub>N<sub>2</sub>(CH<sub>3</sub>)CO}<sub>3</sub>], 124.1 [3C, HB{(C<sub>4</sub>H<sub>4</sub>)C<sub>2</sub>N<sub>2</sub>(CH<sub>3</sub>)CO}<sub>3</sub>], 131.2 [3 C, HB{(C<sub>4</sub>H<sub>4</sub>)C<sub>2</sub>N<sub>2</sub>(CH<sub>3</sub>)CO}<sub>3</sub>], 132.6 [3 C, HB{(C<sub>4</sub>H<sub>4</sub>)C<sub>2</sub>N<sub>2</sub>(CH<sub>3</sub>)CO}<sub>3</sub>], 158.8 [3 C, HB{(C<sub>4</sub>H<sub>4</sub>)C<sub>2</sub>N<sub>2</sub>(CH<sub>3</sub>)CO}<sub>3</sub>]. Analysis calcd. for [To<sup>MeBenz</sup>]ZrCl<sub>3</sub>•CH<sub>2</sub>Cl<sub>2</sub>: C, 40.8%; H, 3.3%; N 11.4%. Found: C, 41.0%; H, 3.4%; N 11.0%.

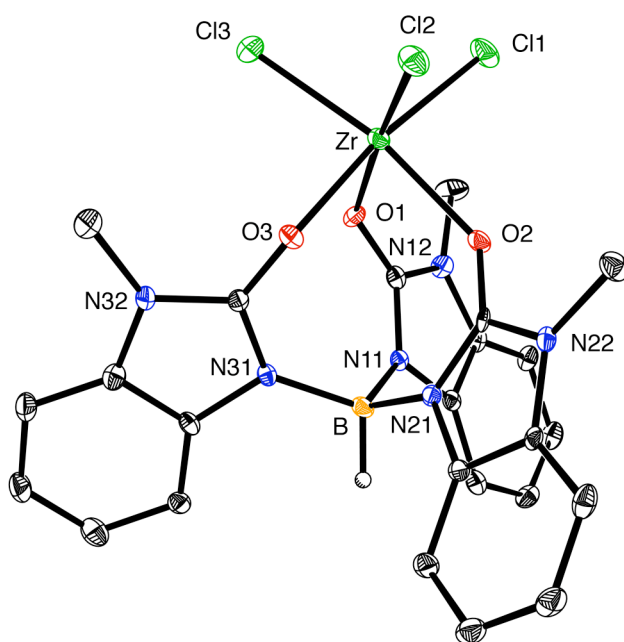

Molecular Structure of [To<sup>MeBenz</sup>]ZrCl<sub>3</sub>

### Synthesis of Cp[To<sup>MeBenz</sup>]ZrCl<sub>2</sub>

A mixture of CpZrCl<sub>3</sub> (18 mg, 0.07 mmol) and [To<sup>MeBenz</sup>]Na•diglyme (40 mg, 0.07 mmol) was placed in an ampoule and treated with benzene (*ca.* 5 mL). The mixture was stirred at room temperature for a period of 2 hours during which it became a suspension. The mixture was treated with *n*-hexane (*ca.* 5 mL) to precipitate more material, which was

isolated by filtration. The precipitate was washed with *n*-hexane, dried *in vacuo*, and then extracted with dichloromethane (*ca.* 5 mL). The volatile components were removed *in vacuo* to give [To<sup>MeBenz</sup>]CpZrCl<sub>2</sub> as a white powder (30 mg, 67%). Crystals suitable for X-ray diffraction were obtained from slow evaporation from a solution in benzene. Analysis calcd. for Cp[To<sup>MeBenz</sup>]ZrCl<sub>2</sub>: C, 51.2%; H, 4.0%; N 12.3%. Found: C, 50.8%; H, 3.9%; N 11.3%. <sup>1</sup>H NMR (C<sub>6</sub>D<sub>6</sub>): 2.88 [s, 6H of HB{(C<sub>4</sub>H<sub>4</sub>)C<sub>2</sub>N<sub>2</sub>(CH<sub>3</sub>)CO}<sub>3</sub>], 3.23 [s, 3H of HB{(C<sub>4</sub>H<sub>4</sub>)C<sub>2</sub>N<sub>2</sub>(CH<sub>3</sub>)CO}<sub>3</sub>], 6.31 [d, <sup>3</sup>J<sub>H-H</sub> = 8, 1H of HB{(C<sub>4</sub>H<sub>4</sub>)C<sub>2</sub>N<sub>2</sub>(CH<sub>3</sub>)CO}<sub>3</sub>], 6.51 [d, <sup>3</sup>J<sub>H-H</sub> = 8, 2H of HB{(C<sub>4</sub>H<sub>4</sub>)C<sub>2</sub>N<sub>2</sub>(CH<sub>3</sub>)CO}<sub>3</sub>], 6.69 [s, 5H of C<sub>5</sub>H<sub>5</sub>], 6.78 [t, <sup>3</sup>J<sub>H-H</sub> = 8, 1H of HB{(C<sub>4</sub>H<sub>4</sub>)C<sub>2</sub>N<sub>2</sub>(CH<sub>3</sub>)CO}<sub>3</sub>], 6.95 [m, 4H of HB{(C<sub>4</sub>H<sub>4</sub>)C<sub>2</sub>N<sub>2</sub>(CH<sub>3</sub>)CO}<sub>3</sub>], 7.06 [t, <sup>3</sup>J<sub>H-H</sub> = 8, 1H of HB{(C<sub>4</sub>H<sub>4</sub>)C<sub>2</sub>N<sub>2</sub>(CH<sub>3</sub>)CO}<sub>3</sub>], 7.48 [d, <sup>3</sup>J<sub>H-H</sub> = 8, 1H of HB{(C<sub>4</sub>H<sub>4</sub>)C<sub>2</sub>N<sub>2</sub>(CH<sub>3</sub>)CO}<sub>3</sub>], 7.67 [d, <sup>3</sup>J<sub>H-H</sub> = 8, 2H of HB{(C<sub>4</sub>H<sub>4</sub>)C<sub>2</sub>N<sub>2</sub>(CH<sub>3</sub>)CO}<sub>3</sub>]. <sup>13</sup>C{<sup>1</sup>H} NMR (C<sub>6</sub>D<sub>6</sub>): 28.0 [2 C, HB{(C<sub>4</sub>H<sub>4</sub>)C<sub>2</sub>N<sub>2</sub>(CH<sub>3</sub>)CO}<sub>3</sub>], 29.1 [1 C, HB{(C<sub>4</sub>H<sub>4</sub>)C<sub>2</sub>N<sub>2</sub>(CH<sub>3</sub>)CO}<sub>3</sub>], 109.2 [2 C, HB{(C<sub>4</sub>H<sub>4</sub>)C<sub>2</sub>N<sub>2</sub>(CH<sub>3</sub>)CO}<sub>3</sub>], 109.4 [1 C, HB{(C<sub>4</sub>H<sub>4</sub>)C<sub>2</sub>N<sub>2</sub>(CH<sub>3</sub>)CO}<sub>3</sub>], 111.6 [1 C, HB{(C<sub>4</sub>H<sub>4</sub>)C<sub>2</sub>N<sub>2</sub>(CH<sub>3</sub>)CO}<sub>3</sub>], 112.9 [2 C, HB{(C<sub>4</sub>H<sub>4</sub>)C<sub>2</sub>N<sub>2</sub>(CH<sub>3</sub>)CO}<sub>3</sub>], 118.2 [5 C, C<sub>5</sub>H<sub>5</sub>], 122.1 [1 C, HB{(C<sub>4</sub>H<sub>4</sub>)C<sub>2</sub>N<sub>2</sub>(CH<sub>3</sub>)CO}<sub>3</sub>], 122.4 [1 C, HB{(C<sub>4</sub>H<sub>4</sub>)C<sub>2</sub>N<sub>2</sub>(CH<sub>3</sub>)CO}<sub>3</sub>], 122.6 [2 C, HB{(C<sub>4</sub>H<sub>4</sub>)C<sub>2</sub>N<sub>2</sub>(CH<sub>3</sub>)CO}<sub>3</sub>], 123.1 [2C, HB{(C<sub>4</sub>H<sub>4</sub>)C<sub>2</sub>N<sub>2</sub>(CH<sub>3</sub>)CO}<sub>3</sub>], 131.0 [2C, HB{(C<sub>4</sub>H<sub>4</sub>)C<sub>2</sub>N<sub>2</sub>(CH<sub>3</sub>)CO}<sub>3</sub>], 131.5 [1C, HB{(C<sub>4</sub>H<sub>4</sub>)C<sub>2</sub>N<sub>2</sub>(CH<sub>3</sub>)CO}<sub>3</sub>], 132.6 [1C, HB{(C<sub>4</sub>H<sub>4</sub>)C<sub>2</sub>N<sub>2</sub>(CH<sub>3</sub>)CO}<sub>3</sub>], 133.1 [2C, HB{(C<sub>4</sub>H<sub>4</sub>)C<sub>2</sub>N<sub>2</sub>(CH<sub>3</sub>)CO}<sub>3</sub>], 159.1 [1C, HB{(C<sub>4</sub>H<sub>4</sub>)C<sub>2</sub>N<sub>2</sub>(CH<sub>3</sub>)CO}<sub>3</sub>], 159.6 [2C, HB{(C<sub>4</sub>H<sub>4</sub>)C<sub>2</sub>N<sub>2</sub>(CH<sub>3</sub>)CO}<sub>3</sub>].

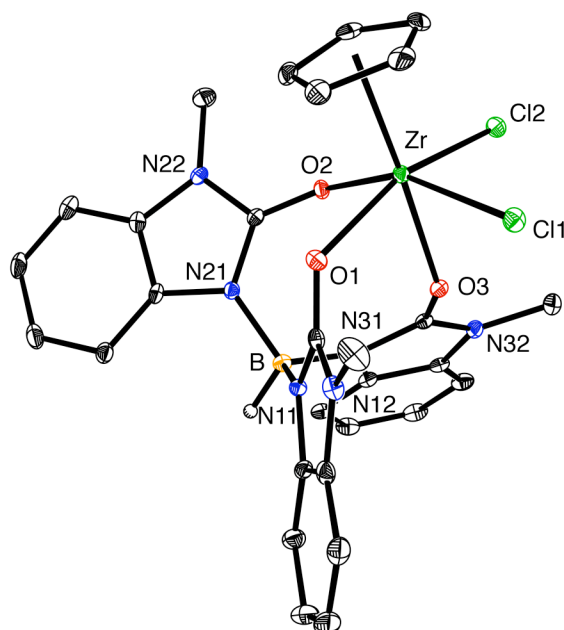

Molecular Structure of  $\text{Cp}[\text{To}^{\text{MeBenz}}]\text{ZrCl}_2$

### Synthesis of $[\text{CpCo}\{\text{P}(\text{O})(\text{OEt})_2\}_3]\text{Re}(\text{CO})_3$

A mixture of  $[\text{CpCo}\{\text{P}(\text{O})(\text{OEt})_2\}_3]\text{Na}$  (69 mg, 0.12 mmol) and  $\text{Re}(\text{CO})_5\text{Br}$  (50 mg, 0.12 mmol) was placed in an ampoule, treated with THF (*ca.* 8 mL) and heated for 3 days at 60 °C. After this period, the mixture was filtered and the volatile components were removed from the filtrate *in vacuo*. The residue was washed with hexane and dissolved in benzene for crystallization to yield yellow crystal (40 mg, 41%).

Analysis calcd.  $[\text{L}_{\text{OEt}}]\text{Re}(\text{CO})_3$ : C, 29.8% ; H, 4.4%. Found: C, 29.6%; H, 4.1%.

$^1\text{H}$  NMR ( $\text{C}_6\text{D}_6$ ): 1.15 [t,  $^3J_{\text{H-H}} = 7$ , 18 H of  $\text{C}_5\text{H}_5\text{Co}\{\text{OP}(\text{CH}_2\text{CH}_3)_2\}_3$ ], 4.07 [m, 12 H of

$\text{C}_5\text{H}_5\text{Co}\{\text{OP}(\text{CH}_2\text{CH}_3)_2\}_3$ ], 4.76 [s, 5H of  $\text{C}_5\text{H}_5\text{Co}\{\text{OP}(\text{CH}_2\text{CH}_3)_2\}_3$ ].  $^{13}\text{C}\{^1\text{H}\}$  NMR ( $\text{C}_6\text{D}_6$ ):

$^{13}\text{C}\{^1\text{H}\}$  NMR ( $\text{C}_6\text{D}_6$ ): 16.8 [m, 6 C of  $\text{C}_5\text{H}_5\text{Co}\{\text{OP}(\text{CH}_2\text{CH}_3)_2\}_3$ ], 61.4 [m, 6 C of

$\text{C}_5\text{H}_5\text{Co}\{\text{OP}(\text{CH}_2\text{CH}_3)_2\}_3$ ], 89.3 [s, 5 C of  $\text{C}_5\text{H}_5\text{Co}\{\text{OP}(\text{CH}_2\text{CH}_3)_2\}_3$ ]. IR Data (KBr disk,

$\text{cm}^{-1}$ ): 2982 (s), 2903 (m), 2367 (w), 2346 (w), 2013 (vs) [ $\nu_{\text{CO}}$ ], 1873 (vs) [ $\nu_{\text{CO}}$ ], 1688 (vw),

1656 (vw), 1478 (w), 1441 (m), 1388 (m), 1115 (vs), 1041 (vs), 936 (vs), 839 (s), 776 (s), 740

(s), 671 (vw), 655 (w), 631 (m), 590 (s), 529 (w), 510 (m). IR Data ( $\text{CH}_2\text{Cl}_2$ ,  $\text{cm}^{-1}$ ): 2015 (s)

[ $\nu_{\text{CO}}$ ], 1880 (s) [ $\nu_{\text{CO}}$ ]. MS:  $m/z = 806.38$  [ $\text{M}^+$ ],  $\text{M} = [\text{CpCo}\{\text{P}(\text{O})(\text{OEt})_2\}_3]\text{Re}(\text{CO})_3$ .

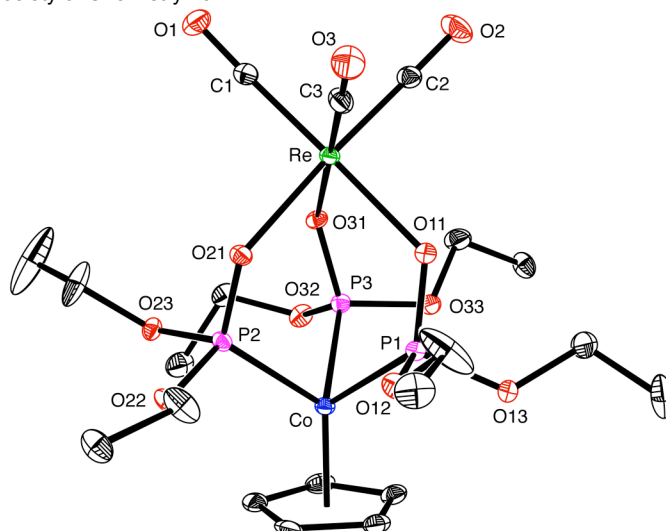

Molecular Structure of  $[\text{CpCo}\{\text{P}(\text{O})(\text{OEt})_2\}_3]\text{Re}(\text{CO})_3$

### Synthesis of $[\text{Tm}^{\text{MeBenz}}]\text{Na}$

A mixture of 1-methyl-2-benzimidazole-2-thione (300 mg, 1.83 mmol) and  $\text{NaBH}_4$  (22 mg, 0.58 mmol) was placed in an ampoule and treated with THF (*ca.* 5 mL). The mixture was heated at 160 °C for 1 week. After this period, the mixture was filtered and the precipitate was dried *in vacuo* to give  $\{[\text{Tm}^{\text{MeBenz}}]\text{Na}\}_2(\text{THF})_3$  as an off-white powder (200 mg, 56%). Analysis calcd. for  $\{[\text{Tm}^{\text{MeBenz}}]\text{Na}\}_2(\text{THF})_3$ : C, 56.7%; H, 5.9%; N 13.2%. Found: C, 56.6%; H, 5.2%; N 13.5%.  $^1\text{H}$  NMR for  $\{[\text{Tm}^{\text{MeBenz}}]\text{Na}\}_2(\text{THF})_3$  ( $d_6$ -DMSO): 1.76 [m, 12H of 3CH<sub>2</sub> of THF], 3.60 [m, 12H of 3CH<sub>2</sub> of THF], 3.64 [s, 18H of HB{(C<sub>4</sub>H<sub>4</sub>)C<sub>2</sub>N<sub>2</sub>(CH<sub>3</sub>)CS<sub>3</sub>}], 6.74 [t,  $^3J_{\text{H-H}} = 7$ , 6H of HB{(C<sub>4</sub>H<sub>4</sub>)C<sub>2</sub>N<sub>2</sub>(CH<sub>3</sub>)CS<sub>3</sub>}], 6.86 [b, 6H of HB{(C<sub>4</sub>H<sub>4</sub>)C<sub>2</sub>N<sub>2</sub>(CH<sub>3</sub>)CS<sub>3</sub>}], 6.94 [t,  $^3J_{\text{H-H}} = 8$ , 6H of HB{(C<sub>4</sub>H<sub>4</sub>)C<sub>2</sub>N<sub>2</sub>(CH<sub>3</sub>)CS<sub>3</sub>}], 7.19 [d,  $^3J_{\text{H-H}} = 8$ , 6H of HB{(C<sub>4</sub>H<sub>4</sub>)C<sub>2</sub>N<sub>2</sub>(CH<sub>3</sub>)CS<sub>3</sub>}].  $^{13}\text{C}\{^1\text{H}\}$  NMR ( $\text{C}_6\text{D}_6$ ): 25.1 [6 C, CH<sub>2</sub> of the THF], 30.3 [6 C, HB{(C<sub>4</sub>H<sub>4</sub>)C<sub>2</sub>N<sub>2</sub>(CH<sub>3</sub>)CS<sub>3</sub>}], 67.0 [6 C, CH<sub>2</sub> of the THF], 107.7 [6 C, HB{(C<sub>4</sub>H<sub>4</sub>)C<sub>2</sub>N<sub>2</sub>(CH<sub>3</sub>)CS<sub>3</sub>}], 112.6 [6 C, HB{(C<sub>4</sub>H<sub>4</sub>)C<sub>2</sub>N<sub>2</sub>(CH<sub>3</sub>)CS<sub>3</sub>}], 120.3 [6 C, HB{(C<sub>4</sub>H<sub>4</sub>)C<sub>2</sub>N<sub>2</sub>(CH<sub>3</sub>)CS<sub>3</sub>}], 121.0 [6 C, HB{(C<sub>4</sub>H<sub>4</sub>)C<sub>2</sub>N<sub>2</sub>(CH<sub>3</sub>)CS<sub>3</sub>}], 133.8 [6 C, HB{(C<sub>4</sub>H<sub>4</sub>)C<sub>2</sub>N<sub>2</sub>(CH<sub>3</sub>)CS<sub>3</sub>}], 136.6 [6 C, HB{(C<sub>4</sub>H<sub>4</sub>)C<sub>2</sub>N<sub>2</sub>(CH<sub>3</sub>)CS<sub>3</sub>}], 172.8 [6 C, HB{(C<sub>4</sub>H<sub>4</sub>)C<sub>2</sub>N<sub>2</sub>(CH<sub>3</sub>)CS<sub>3</sub>}]. FAB-MS:  $m/z = 525.2$   $[\text{M}+1]^+$ ,  $\text{M} = [\text{Tm}^{\text{MeBenz}}]\text{Na}$ . IR Data (KBr disk,  $\text{cm}^{-1}$ ): 3450 (br), 3052 (w), 2929 (w), 2868 (w), 2423 (w) [ $\nu_{\text{BH}}$ ], 1620 (m), 1544

(w), 1484 (s), 1460 (w), 1432 (s), 1344 (s), 1293 (s), 1230 (m), 1190 (m), 1158 (m), 1092 (m), 997 (m), 858 (w), 813 (m), 742 (s), 620 (m), 555 (m), 421 (m).

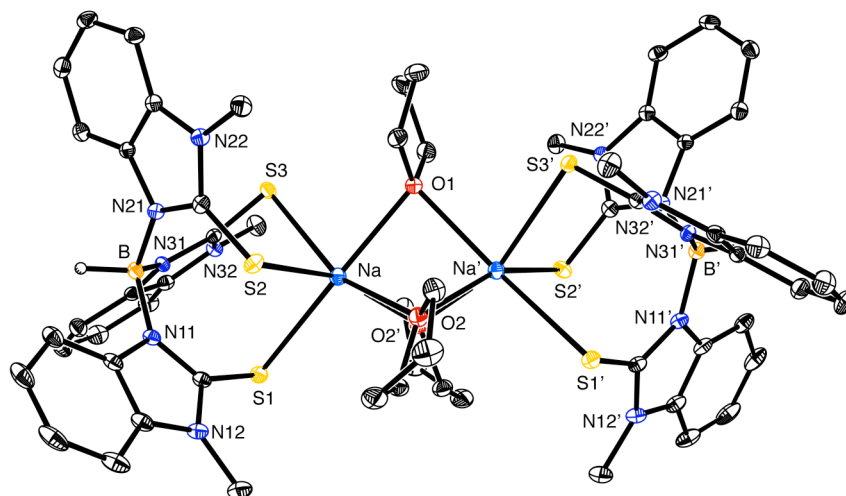

Molecular Structure of  $\{[Tm^{MeBenz}]Na\}_2(THF)_3$

$[Tm^{MeBenz}]Na$  free of THF may be obtained by washing with  $Et_2O$ .  $^1H$  NMR for  $[Tm^{MeBenz}]Na$  ( $d_6$ -DMSO): 3.64 [s, 9H of  $HB\{(C_4H_4)C_2N_2(CH_3)CS\}_3$ ], 6.74 [t,  $^3J_{H-H} = 7$ , 3H of  $HB\{(C_4H_4)C_2N_2(CH_3)CS\}_3$ ], 6.87 [b, 3H of  $HB\{(C_4H_4)C_2N_2(CH_3)CS\}_3$ ], 6.94 [t,  $^3J_{H-H} = 8$ , 3H of  $HB\{(C_4H_4)C_2N_2(CH_3)CS\}_3$ ], 7.18 [d,  $^3J_{H-H} = 8$ , 3H of  $HB\{(C_4H_4)C_2N_2(CH_3)CS\}_3$ ].  $^{13}C\{^1H\}$  NMR ( $d_6$ -DMSO): 30.3 [3 C,  $HB\{(C_4H_4)C_2N_2(CH_3)CS\}_3$ ], 107.7 [3 C,  $HB\{(C_4H_4)C_2N_2(CH_3)CS\}_3$ ], 112.6 [3 C,  $HB\{(C_4H_4)C_2N_2(CH_3)CS\}_3$ ], 120.3 [3 C,  $HB\{(C_4H_4)C_2N_2(CH_3)CS\}_3$ ], 121.0 [3 C,  $HB\{(C_4H_4)C_2N_2(CH_3)CS\}_3$ ], 133.8 [3 C,  $HB\{(C_4H_4)C_2N_2(CH_3)CS\}_3$ ], 136.6 [3 C,  $HB\{(C_4H_4)C_2N_2(CH_3)CS\}_3$ ], 172.8 [3 C,  $HB\{(C_4H_4)C_2N_2(CH_3)CS\}_3$ ].

### Synthesis of $[Tm^{MeBenz}]Re(CO)_3$

A mixture of  $[Tm^{MeBenz}]Na \cdot 1.5THF$  (50 mg, 0.08 mmol) and  $Re(CO)_5Br$  (33 mg, 0.08 mmol) was placed in an ampoule and treated with THF (*ca.* 5 mL) and heated overnight at 70 °C. The mixture was filtered and the volatile components were removed from the filtrate *in vacuo*. The residue obtained was washed with acetonitrile (*ca.* 5 mL) to give  $[Tm^{MeBenz}]Re(CO)_3$  as white powder (20 mg, 33%). Crystals suitable for X-ray diffraction

were obtained from slow evaporation from a solution in benzene. Analysis calcd. for  $[\text{Tm}^{\text{MeBenz}}]\text{Re}(\text{CO})_3 \cdot 1.8\text{C}_6\text{H}_6$ : C, 49.8%; H, 3.6%; N 9.2%. Found: C, 49.4%; H, 4.6%; N 9.0%.  $^1\text{H}$  NMR ( $\text{C}_6\text{D}_6$ ): 3.08 [s, 9H of  $\text{HB}\{(\text{C}_4\text{H}_4)\text{C}_2\text{N}_2(\text{CH}_3)\text{CS}\}_3$ ], 6.54 [d,  $^3J_{\text{H-H}} = 8$ , 3H of  $\text{HB}\{(\text{C}_4\text{H}_4)\text{C}_2\text{N}_2(\text{CH}_3)\text{CS}\}_3$ ], 6.96 [m, 6H of  $\text{HB}\{(\text{C}_4\text{H}_4)\text{C}_2\text{N}_2(\text{CH}_3)\text{CS}\}_3$ ], 7.58 [d,  $^3J_{\text{H-H}} = 8$ , 3H of  $\text{HB}\{(\text{C}_4\text{H}_4)\text{C}_2\text{N}_2(\text{CH}_3)\text{CS}\}_3$ ].  $^{13}\text{C}\{^1\text{H}\}$  NMR ( $\text{C}_6\text{D}_6$ ): 30.6 [3 C,  $\text{HB}\{(\text{C}_4\text{H}_4)\text{C}_2\text{N}_2(\text{CH}_3)\text{CS}\}_3$ ], 110.8 [3C,  $\text{HB}\{(\text{C}_4\text{H}_4)\text{C}_2\text{N}_2(\text{CH}_3)\text{CS}\}_3$ ], 113.3 [3C,  $\text{HB}\{(\text{C}_4\text{H}_4)\text{C}_2\text{N}_2(\text{CH}_3)\text{CS}\}_3$ ], 123.7 [3C,  $\text{HB}\{(\text{C}_4\text{H}_4)\text{C}_2\text{N}_2(\text{CH}_3)\text{CS}\}_3$ ], 124.1 [3C,  $\text{HB}\{(\text{C}_4\text{H}_4)\text{C}_2\text{N}_2(\text{CH}_3)\text{CS}\}_3$ ], 133.7 [3C,  $\text{HB}\{(\text{C}_4\text{H}_4)\text{C}_2\text{N}_2(\text{CH}_3)\text{CS}\}_3$ ], 135.7 [3C,  $\text{HB}\{(\text{C}_4\text{H}_4)\text{C}_2\text{N}_2(\text{CH}_3)\text{CS}\}_3$ ], 167.5 [3C,  $\text{HB}\{(\text{C}_4\text{H}_4)\text{C}_2\text{N}_2(\text{CH}_3)\text{CS}\}_3$ ]. FAB-MS:  $m/z = 772.1$   $[\text{M}]^+$ ,  $\text{M} = [\text{Tm}^{\text{MeBenz}}]\text{Re}(\text{CO})_3$ . IR Data (KBr disk,  $\text{cm}^{-1}$ ): 2925 (m), 2010 (s)  $[\nu_{\text{CO}}]$ , 1922 (s)  $[\nu_{\text{CO}}]$ , 1478 (m), 1439 (m), 1409 (m), 1363 (m), 1293 (m), 1233 (w), 1193 (w), 1149 (w), 1120 (w), 1094 (w), 1014 (w), 853 (m), 812 (m), 749 (m), 672 (w), 624 (m), 556 (w), 516 (w), 482 (w), 437 (w), 420 (w). IR Data ( $\text{CH}_2\text{Cl}_2$ ,  $\text{cm}^{-1}$ ): 2014 (m)  $[\nu_{\text{CO}}]$ , 1895 (m)  $[\nu_{\text{CO}}]$ .

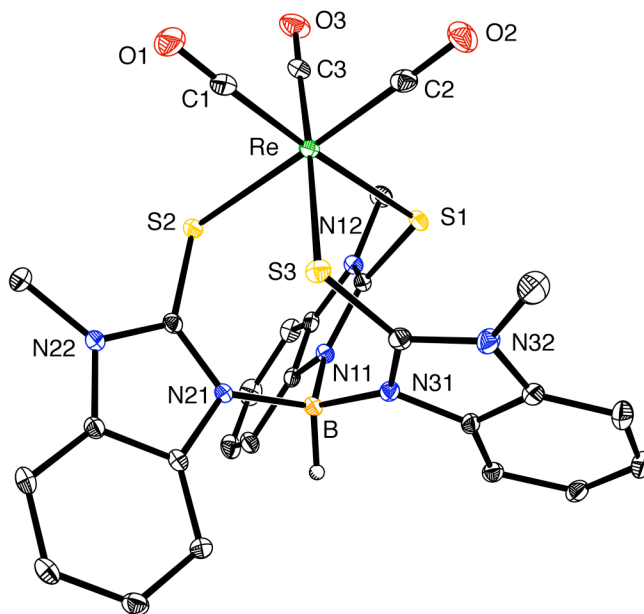

Molecular Structure of  $[\text{Tm}^{\text{MeBenz}}]\text{Re}(\text{CO})_3$

## Synthesis of $[\text{To}^{\text{Bu}^t}]\text{Na}$

A mixture of 1-*tert*-butyl-1,3-dihydro-2*H*-imidazol-2-one (200 mg, 1.43 mmol) and  $\text{NaBH}_4$  (18 mg, 0.47 mmol) was placed in an ampoule and treated with THF (4 mL). The mixture was heated at 180 °C for 9 days and cooled to room temperature. The volatile components were removed *in vacuo* and the residue obtained was crystallized from pentane (*ca.* 5 mL) and dried to give  $[\text{To}^{\text{Bu}^t}]\text{Na}$  as colorless crystals (14 mg, 7%).  $^1\text{H}$  NMR ( $\text{C}_6\text{D}_6$ ): 1.37 [s, 27H of  $\text{HB}\{\text{C}_2\text{N}_2\text{H}_2[\text{C}(\text{CH}_3)_3]\text{CO}\}_3$ ], 6.08 [d,  $^3J_{\text{H-H}} = 3$ , 3H of  $\text{HB}\{\text{C}_2\text{N}_2\text{H}_2[\text{C}(\text{CH}_3)_3]\text{CO}\}_3$ ], 6.62 [br, 3H of  $\text{HB}\{\text{C}_2\text{N}_2\text{H}_2[\text{C}(\text{CH}_3)_3]\text{CO}\}_3$ ].  $^{13}\text{C}\{^1\text{H}\}$  NMR ( $\text{C}_6\text{D}_6$ ): 28.5 [9 C,  $\text{HB}\{\text{C}_2\text{N}_2\text{H}_2[\text{C}(\text{CH}_3)_3]\text{CO}\}_3$ ], 53.9 [3 C,  $\text{HB}\{\text{C}_2\text{N}_2\text{H}_2[\text{C}(\text{CH}_3)_3]\text{CO}\}_3$ ], 107.7 [3 C,  $\text{HB}\{\text{C}_2\text{N}_2\text{H}_2[\text{C}(\text{CH}_3)_3]\text{CO}\}_3$ ], 112.3 [3 C,  $\text{HB}\{\text{C}_2\text{N}_2\text{H}_2[\text{C}(\text{CH}_3)_3]\text{CO}\}_3$ ], 157.6 [3 C,  $\text{HB}\{\text{C}_2\text{N}_2\text{H}_2[\text{C}(\text{CH}_3)_3]\text{CO}\}_3$ ]. FAB-MS:  $m/z = 475.3$   $[\text{M} + \text{Na}]^+$ ,  $\text{M} = [\text{To}^{\text{Bu}^t}]\text{Na}$ .

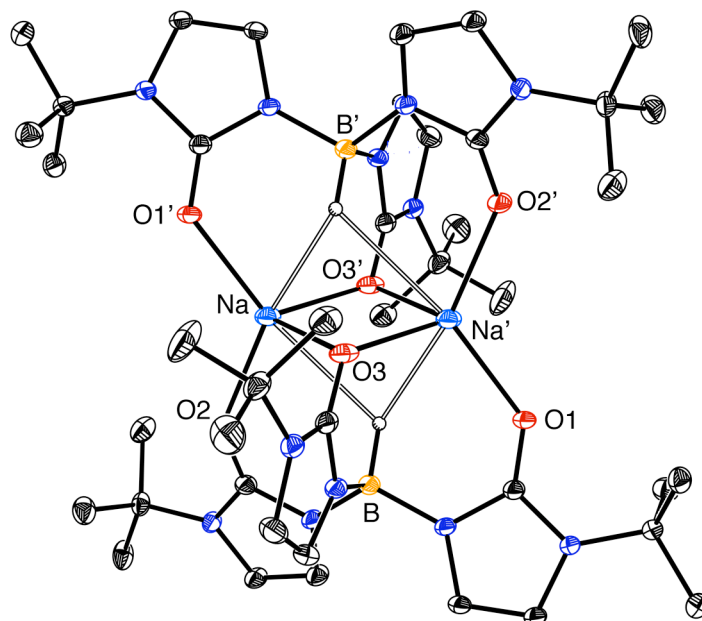

Molecular Structure of  $\{[\text{To}^{\text{Bu}^t}]\text{Na}\}_2$

The formation of  $[\text{To}^{\text{Bu}^t}]\text{Na}$ , however, is accompanied side reactions, one of which the  $\text{C}=\text{C}$  double bond of the imidazolone ring is reduced, thereby resulting in the formation of 1-*t*-butylimidazolidinone, which was identified by  $^1\text{H}$  NMR spectroscopy and X-ray diffraction.  $^1\text{H}$  NMR for 1-*t*-butylimidazolidinone ( $\text{C}_6\text{D}_6$ ): 1.29 [s, 9H of

$\text{C}_2\text{H}_4\text{NHN}[\text{C}(\text{CH}_3)_3]\text{CO}$ , 2.43 [t,  $^3J_{\text{H-H}} = 8$ , 2H of  $\text{C}_2\text{H}_4\text{NHN}[\text{C}(\text{CH}_3)_3]\text{CO}$ ], 2.69 [t,  $^3J_{\text{H-H}} = 8$ , 2H of  $\text{C}_2\text{H}_4\text{NHN}[\text{C}(\text{CH}_3)_3]\text{CO}$ ], NH not observed.

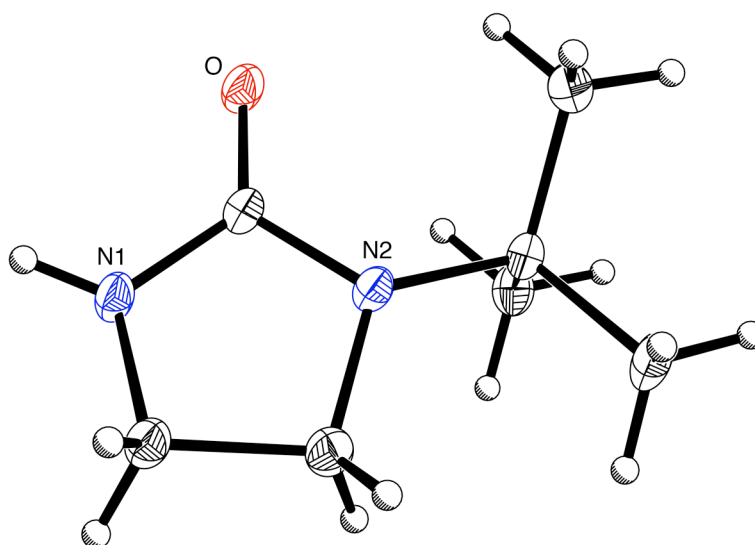

*Molecular Structure of 1-t-butylimidazolidinone*

### Synthesis of $[\text{To}^{\text{Bu}^t}]\text{Re}(\text{CO})_3$

A mixture of  $[\text{To}^{\text{Bu}^t}]\text{Na}$  (14 mg, 0.03 mmol) and  $\text{Re}(\text{CO})_5\text{Br}$  (15 mg, 0.04 mmol) was treated with benzene (*ca.* 1 mL) and heated at 70 °C overnight, during which period a small amount of colorless blocks of  $[\text{To}^{\text{Bu}^t}]\text{Re}(\text{CO})_3$  suitable for X-ray were deposited and isolated by filtration. The filtrate was lyophilized resulting in a white powder. The residue was dissolved in hexane/ $\text{Et}_2\text{O}$  (*ca.* 50:50) to give a solution from which colorless crystals of  $[\text{To}^{\text{Bu}^t}]\text{Re}(\text{CO})_3$  were obtained by slow evaporation (8 mg, 37%).  $^1\text{H}$  NMR ( $\text{C}_6\text{D}_6$ ): 1.29 [s, 27H of  $\text{HB}\{\text{C}_2\text{N}_2\text{H}_2[\text{C}(\text{CH}_3)_3]\text{CO}\}_3$ ], 5.87 [d,  $^3J_{\text{H-H}} = 3$ , 3H of  $\text{HB}\{\text{C}_2\text{N}_2\text{H}_2[\text{C}(\text{CH}_3)_3]\text{CO}\}_3$ ], 6.28 [d,  $^3J_{\text{H-H}} = 3$ , 3H of  $\text{HB}\{\text{C}_2\text{N}_2\text{H}_2[\text{C}(\text{CH}_3)_3]\text{CO}\}_3$ ].  $^{13}\text{C}\{^1\text{H}\}$  NMR ( $\text{C}_6\text{D}_6$ ): 29.1 [9 C,  $\text{HB}\{\text{C}_2\text{N}_2\text{H}_2[\text{C}(\text{CH}_3)_3]\text{CO}\}_3$ ], 55.9 [3 C,  $\text{HB}\{\text{C}_2\text{N}_2\text{H}_2[\text{C}(\text{CH}_3)_3]\text{CO}\}_3$ ], 110.4 [3 C,  $\text{HB}\{\text{C}_2\text{N}_2\text{H}_2[\text{C}(\text{CH}_3)_3]\text{CO}\}_3$ ], 116.8 [3 C,  $\text{HB}\{\text{C}_2\text{N}_2\text{H}_2[\text{C}(\text{CH}_3)_3]\text{CO}\}_3$ ], 157.0 [3 C,  $\text{HB}\{\text{C}_2\text{N}_2\text{H}_2[\text{C}(\text{CH}_3)_3]\text{CO}\}_3$ ]. FAB-MS:  $m/z = 700.6$   $[\text{M}]^+$ ,  $\text{M} = [\text{To}^{\text{Bu}^t}]\text{Re}(\text{CO})_3$  superimposed by  $[\text{M}+1]^+$ ;  $m/z = 672.6$   $[\text{M}-\text{CO}]^+$ ,  $\text{M} = [\text{To}^{\text{Bu}^t}]\text{Re}(\text{CO})_3$ . IR Data (KBr disk,  $\text{cm}^{-1}$ ): 2979 (m), 2925 (m), 2431 (w) [ $\nu_{\text{BH}}$ ], 2017 (vs) [ $\nu_{\text{CO}}$ ], 1879



(vs)  $[\nu_{\text{CO}}]$ , 1621 (s), 1587 (s), 1436 (m), 1370 (w), 1215 (m), 1194 (m), 1085 (w), 805 (w), 773 (w), 743 (w), 680 (w). IR Data ( $\text{CH}_2\text{Cl}_2$ ,  $\text{cm}^{-1}$ ): 2018 (m)  $[\nu_{\text{CO}}]$ , 1887 (s)  $[\nu_{\text{CO}}]$ .

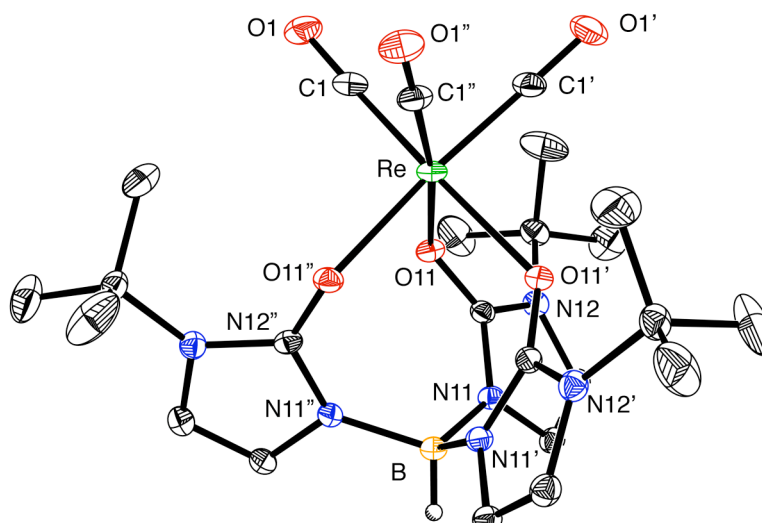

Molecular Structure of  $[\text{To}^{\text{Bu}^t}]\text{Re}(\text{CO})_3$

### Synthesis of $[\text{To}^{\text{Bu}^t}]\text{ZrCl}_3$

A mixture of  $[\text{To}^{\text{Bu}^t}]\text{Na}$  (16 mg, 0.04 mmol) and  $\text{ZrCl}_4$  (12.3 mg, 0.05 mmol) was treated with benzene (*ca.* 1 mL) and heated at 60 °C for 4 hours, during which period a small amount of colorless blocks of  $[\text{To}^{\text{Bu}^t}]\text{ZrCl}_3$  suitable for X-ray were deposited. The mixture was filtered and the residue was extracted with chloroform ( $3 \times \text{ca.}$  3 mL). The volatile components were removed *in vacuo* and the residue obtained was washed with hexanes (*ca.* 3 mL) yielding  $[\text{To}^{\text{Bu}^t}]\text{ZrCl}_3$  as an off-white powder (6 mg, 27%).  $^1\text{H}$  NMR ( $\text{C}_6\text{D}_6$ ): 1.66 [s, 27H of  $\text{HB}\{\text{C}_2\text{N}_2\text{H}_2[\text{C}(\underline{\text{CH}_3})_3]\text{CO}\}_3$ ], 6.46 [d,  $^3J_{\text{H-H}} = 3$ , 3H of  $\text{HB}\{\text{C}_2\text{N}_2\text{H}_2[\text{C}(\text{CH}_3)_3]\text{CO}\}_3$ ], 6.50 [d,  $^3J_{\text{H-H}} = 3$ , 3H of  $\text{HB}\{\text{C}_2\text{N}_2\text{H}_2[\text{C}(\text{CH}_3)_3]\text{CO}\}_3$ ].  $^{13}\text{C}\{^1\text{H}\}$  NMR ( $\text{C}_6\text{D}_6$ ): 29.4 [9 C,  $\text{HB}\{\text{C}_2\text{N}_2\text{H}_2[\text{C}(\underline{\text{CH}_3})_3]\text{CO}\}_3$ ], 57.9 [3 C,  $\text{HB}\{\text{C}_2\text{N}_2\text{H}_2[\underline{\text{C}}(\text{CH}_3)_3]\text{CO}\}_3$ ], 110.7 [3 C,  $\text{HB}\{\underline{\text{C}}_2\text{N}_2\text{H}_2[\text{C}(\text{CH}_3)_3]\text{CO}\}_3$ ], 119.0 [3 C,  $\text{HB}\{\underline{\text{C}}_2\text{N}_2\text{H}_2[\text{C}(\text{CH}_3)_3]\text{CO}\}_3$ ], 152.7 [3 C,  $\text{HB}\{\text{C}_2\text{N}_2\text{H}_2[\text{C}(\text{CH}_3)_3]\underline{\text{C}}\text{O}\}_3$ ].

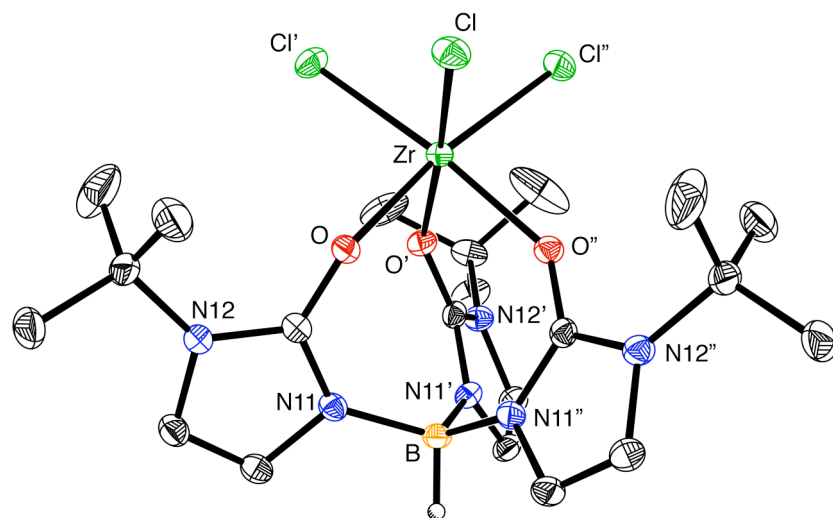

*Molecular Structure of [To<sup>Bu<sup>t</sup>}]ZrCl<sub>3</sub></sup>*

**Table 1.** Crystal, intensity collection and refinement data.

|                                          | [To <sup>Bu<sup>t</sup></sup> ]Na                                                             | [To <sup>Bu<sup>t</sup></sup> ]ZrCl <sub>3</sub>                                  |
|------------------------------------------|-----------------------------------------------------------------------------------------------|-----------------------------------------------------------------------------------|
| lattice                                  | Triclinic                                                                                     | Trigonal                                                                          |
| formula                                  | C <sub>42</sub> H <sub>68</sub> B <sub>2</sub> N <sub>12</sub> Na <sub>2</sub> O <sub>6</sub> | C <sub>39</sub> H <sub>52</sub> BCl <sub>3</sub> N <sub>6</sub> O <sub>3</sub> Zr |
| formula weight                           | 904.68                                                                                        | 861.25                                                                            |
| space group                              | <i>P</i> -1                                                                                   | <i>P</i> -3                                                                       |
| <i>a</i> /Å                              | 10.357(3)                                                                                     | 16.242(2)                                                                         |
| <i>b</i> /Å                              | 10.900(3)                                                                                     | 16.242(2)                                                                         |
| <i>c</i> /Å                              | 12.135(4)                                                                                     | 9.4661(14)                                                                        |
| $\alpha$ /°                              | 104.306(5)                                                                                    | 90                                                                                |
| $\beta$ /°                               | 92.511(5)                                                                                     | 90                                                                                |
| $\gamma$ /°                              | 108.015(5)                                                                                    | 120                                                                               |
| <i>V</i> /Å <sup>3</sup>                 | 1251.6(6)                                                                                     | 2162.6(5)                                                                         |
| <i>Z</i>                                 | 1                                                                                             | 2                                                                                 |
| temperature (K)                          | 150(2)                                                                                        | 150(2)                                                                            |
| radiation ( $\lambda$ , Å)               | 0.71073                                                                                       | 0.71073                                                                           |
| $\rho$ (calcd.), g cm <sup>-3</sup>      | 1.200                                                                                         | 1.323                                                                             |
| $\mu$ (Mo K $\alpha$ ), mm <sup>-1</sup> | 0.096                                                                                         | 0.482                                                                             |
| $\theta$ max, deg.                       | 26.37                                                                                         | 30.50                                                                             |
| no. of data collected                    | 15155                                                                                         | 35051                                                                             |
| no. of data used                         | 5123                                                                                          | 4410                                                                              |
| no. of parameters                        | 302                                                                                           | 111                                                                               |
| $R_1$ [ $I > 2\sigma(I)$ ]               | 0.0568                                                                                        | 0.0436                                                                            |
| $wR_2$ [ $I > 2\sigma(I)$ ]              | 0.0784                                                                                        | 0.1087                                                                            |
| $R_1$ [all data]                         | 0.1517                                                                                        | 0.0607                                                                            |
| $wR_2$ [all data]                        | 0.0932                                                                                        | 0.1139                                                                            |
| GOF                                      | 1.092                                                                                         | 1.093                                                                             |
| $R_{\text{int}}$                         | 0.0880                                                                                        | 0.0541                                                                            |

**Table 1(cont).** Crystal, intensity collection and refinement data.

|                                                              | <b>[To<sup>Bu<sup>t</sup>]</sup></b> Re(CO) <sub>3</sub>          | <b>1-t-butyl-<br/>imidazolidinone</b>           |
|--------------------------------------------------------------|-------------------------------------------------------------------|-------------------------------------------------|
| lattice                                                      | Trigonal                                                          | Monoclinic                                      |
| formula                                                      | C <sub>42</sub> H <sub>52</sub> BN <sub>6</sub> O <sub>6</sub> Re | C <sub>7</sub> H <sub>14</sub> N <sub>2</sub> O |
| formula weight                                               | 933.91                                                            | 142.20                                          |
| space group                                                  | <i>P</i> -3                                                       | <i>P</i> 2 <sub>1</sub> / <i>c</i>              |
| <i>a</i> /Å                                                  | 16.131(2)                                                         | 12.2165(13)                                     |
| <i>b</i> /Å                                                  | 16.131(2)                                                         | 6.1075(6)                                       |
| <i>c</i> /Å                                                  | 9.6857(14)                                                        | 10.7386(11)                                     |
| $\alpha$ /°                                                  | 90                                                                | 90                                              |
| $\beta$ /°                                                   | 90                                                                | 96.338(2)                                       |
| $\gamma$ /°                                                  | 120                                                               | 90                                              |
| <i>V</i> /Å <sup>3</sup>                                     | 2182.6(6)                                                         | 796.33(14)                                      |
| <i>Z</i>                                                     | 2                                                                 | 4                                               |
| temperature (K)                                              | 200(2)                                                            | 125(2)                                          |
| radiation ( $\lambda$ , Å)                                   | 0.71073                                                           | 0.71073                                         |
| $\rho$ (calcd.), g cm <sup>-3</sup>                          | 1.421                                                             | 1.186                                           |
| $\mu$ (Mo K $\alpha$ ), mm <sup>-1</sup>                     | 2.835                                                             | 0.081                                           |
| $\theta$ max, deg.                                           | 30.71                                                             | 30.50                                           |
| no. of data<br>collected                                     | 34854                                                             | 12129                                           |
| no. of data used                                             | 4523                                                              | 2430                                            |
| no. of parameters                                            | 175                                                               | 98                                              |
| <i>R</i> <sub>1</sub> [ <i>I</i> > 2 $\sigma$ ( <i>I</i> )]  | 0.0363                                                            | 0.0473                                          |
| <i>wR</i> <sub>2</sub> [ <i>I</i> > 2 $\sigma$ ( <i>I</i> )] | 0.0586                                                            | 0.1277                                          |
| <i>R</i> <sub>1</sub> [all data]                             | 0.0822                                                            | 0.0655                                          |
| <i>wR</i> <sub>2</sub> [all data]                            | 0.0714                                                            | 0.1420                                          |
| GOF                                                          | 1.131                                                             | 1.037                                           |
| <i>R</i> <sub>int</sub>                                      | 0.0818                                                            | 0.0431                                          |

**Table 1(cont).** Crystal, intensity collection and refinement data.

|                                          | [To <sup>MeBenz</sup> ]Na                                        | [To <sup>MeBenz</sup> ]ZnI                                                           |
|------------------------------------------|------------------------------------------------------------------|--------------------------------------------------------------------------------------|
| lattice                                  | Triclinic                                                        | Triclinic                                                                            |
| formula                                  | C <sub>30</sub> H <sub>36</sub> BN <sub>6</sub> NaO <sub>6</sub> | C <sub>25.5</sub> H <sub>25</sub> BCl <sub>3</sub> IN <sub>6</sub> O <sub>3</sub> Zn |
| formula weight                           | 610.45                                                           | 772.95                                                                               |
| space group                              | <i>P</i> -1                                                      | <i>P</i> -1                                                                          |
| <i>a</i> /Å                              | 13.7551(9)                                                       | 9.361(5)                                                                             |
| <i>b</i> /Å                              | 14.9081(10)                                                      | 11.221(7)                                                                            |
| <i>c</i> /Å                              | 15.2676(10)                                                      | 17.165(13)                                                                           |
| $\alpha$ /°                              | 82.3230(10)                                                      | 96.785(11)                                                                           |
| $\beta$ /°                               | 89.7710(10)                                                      | 103.212(11)                                                                          |
| $\gamma$ /°                              | 81.6210(10)                                                      | 113.522(8)                                                                           |
| <i>V</i> /Å <sup>3</sup>                 | 3069.2(4)                                                        | 1564.5(18)                                                                           |
| <i>Z</i>                                 | 4                                                                | 2                                                                                    |
| temperature (K)                          | 200(2)                                                           | 200(2)                                                                               |
| radiation ( $\lambda$ , Å)               | 0.71073                                                          | 0.71073                                                                              |
| $\rho$ (calcd.), g cm <sup>-3</sup>      | 1.321                                                            | 1.641                                                                                |
| $\mu$ (Mo K $\alpha$ ), mm <sup>-1</sup> | 0.105                                                            | 2.065                                                                                |
| $\theta$ max, deg.                       | 32.57                                                            | 30.15                                                                                |
| no. of data collected                    | 52297                                                            | 24328                                                                                |
| no. of data used                         | 20703                                                            | 9138                                                                                 |
| no. of parameters                        | 811                                                              | 368                                                                                  |
| $R_1$ [ $I > 2\sigma(I)$ ]               | 0.0494                                                           | 0.0520                                                                               |
| $wR_2$ [ $I > 2\sigma(I)$ ]              | 0.1178                                                           | 0.1122                                                                               |
| $R_1$ [all data]                         | 0.1003                                                           | 0.1108                                                                               |
| $wR_2$ [all data]                        | 0.1427                                                           | 0.1336                                                                               |
| GOF                                      | 1.021                                                            | 1.009                                                                                |
| $R_{\text{int}}$                         | 0.0373                                                           | 0.0531                                                                               |

**Table 1(cont).** Crystal, intensity collection and refinement data.

|                                          | [To <sup>MeBenz</sup> ] <sub>2</sub> Co                                                         | [To <sup>MeBenz</sup> ] <sub>2</sub> Fe                                                         |
|------------------------------------------|-------------------------------------------------------------------------------------------------|-------------------------------------------------------------------------------------------------|
| lattice                                  | Triclinic                                                                                       | Triclinic                                                                                       |
| formula                                  | C <sub>50</sub> H <sub>46</sub> B <sub>2</sub> Cl <sub>6</sub> CoN <sub>12</sub> O <sub>6</sub> | C <sub>50</sub> H <sub>46</sub> B <sub>2</sub> Cl <sub>6</sub> FeN <sub>12</sub> O <sub>6</sub> |
| formula weight                           | 1204.24                                                                                         | 1201.16                                                                                         |
| space group                              | <i>P</i> -1                                                                                     | <i>P</i> -1                                                                                     |
| <i>a</i> /Å                              | 11.027(2)                                                                                       | 9.765(7)                                                                                        |
| <i>b</i> /Å                              | 11.171(2)                                                                                       | 11.496(8)                                                                                       |
| <i>c</i> /Å                              | 11.536(2)                                                                                       | 13.698(9)                                                                                       |
| $\alpha$ /°                              | 85.955(3)                                                                                       | 87.906(10)                                                                                      |
| $\beta$ /°                               | 78.386(3)                                                                                       | 69.479(10)                                                                                      |
| $\gamma$ /°                              | 74.761(3)                                                                                       | 72.277(10)                                                                                      |
| <i>V</i> /Å <sup>3</sup>                 | 1342.8(4)                                                                                       | 1367.6(16)                                                                                      |
| <i>Z</i>                                 | 1                                                                                               | 1                                                                                               |
| temperature (K)                          | 160(2)                                                                                          | 125(2)                                                                                          |
| radiation ( $\lambda$ , Å)               | 0.71073                                                                                         | 0.71073                                                                                         |
| $\rho$ (calcd.), g cm <sup>-3</sup>      | 1.489                                                                                           | 1.458                                                                                           |
| $\mu$ (Mo K $\alpha$ ), mm <sup>-1</sup> | 0.680                                                                                           | 0.629                                                                                           |
| $\theta$ max, deg.                       | 30.47                                                                                           | 30.62                                                                                           |
| no. of data collected                    | 21660                                                                                           | 16628                                                                                           |
| no. of data used                         | 8101                                                                                            | 8255                                                                                            |
| no. of parameters                        | 356                                                                                             | 356                                                                                             |
| $R_1$ [ $I > 2\sigma(I)$ ]               | 0.0637                                                                                          | 0.0670                                                                                          |
| $wR_2$ [ $I > 2\sigma(I)$ ]              | 0.1400                                                                                          | 0.1219                                                                                          |
| $R_1$ [all data]                         | 0.1520                                                                                          | 0.1569                                                                                          |
| $wR_2$ [all data]                        | 0.1701                                                                                          | 0.1527                                                                                          |
| GOF                                      | 1.000                                                                                           | 1.000                                                                                           |
| $R_{\text{int}}$                         | 0.0761                                                                                          | 0.0727                                                                                          |

**Table 1(cont).** Crystal, intensity collection and refinement data.

|                                                              | [To <sup>MeBenz</sup> ] <b>Re</b> (CO) <sub>3</sub>               | [To <sup>MeBenz</sup> ] <b>Zr</b> Cl <sub>3</sub>                                 |
|--------------------------------------------------------------|-------------------------------------------------------------------|-----------------------------------------------------------------------------------|
| lattice                                                      | Rhombohedral                                                      | Monoclinic                                                                        |
| formula                                                      | C <sub>27</sub> H <sub>22</sub> BN <sub>6</sub> O <sub>6</sub> Re | C <sub>25</sub> H <sub>23</sub> BCl <sub>6</sub> N <sub>6</sub> O <sub>3</sub> Zr |
| formula weight                                               | 723.52                                                            | 770.22                                                                            |
| space group                                                  | <i>R</i> -3                                                       | <i>P</i> 2 <sub>1</sub> / <i>n</i>                                                |
| <i>a</i> /Å                                                  | 15.5893(14)                                                       | 15.611(3)                                                                         |
| <i>b</i> /Å                                                  | 15.5893(14)                                                       | 12.966(3)                                                                         |
| <i>c</i> /Å                                                  | 19.0929(14)                                                       | 15.764(4)                                                                         |
| $\alpha$ /°                                                  | 90                                                                | 90                                                                                |
| $\beta$ /°                                                   | 90                                                                | 103.384(4)                                                                        |
| $\gamma$ /°                                                  | 120                                                               | 90                                                                                |
| <i>V</i> /Å <sup>3</sup>                                     | 4018.4(6)                                                         | 3104.4(12)                                                                        |
| <i>Z</i>                                                     | 6                                                                 | 4                                                                                 |
| temperature (K)                                              | 123(2)                                                            | 125(2)                                                                            |
| radiation ( $\lambda$ , Å)                                   | 0.71073                                                           | 0.71073                                                                           |
| $\rho$ (calcd.), g cm <sup>-3</sup>                          | 1.794                                                             | 1.648                                                                             |
| $\mu$ (Mo K $\alpha$ ), mm <sup>-1</sup>                     | 4.590                                                             | 0.910                                                                             |
| $\theta$ max, deg.                                           | 32.71                                                             | 26.37                                                                             |
| no. of data collected                                        | 23365                                                             | 36423                                                                             |
| no. of data used                                             | 3200                                                              | 6363                                                                              |
| no. of parameters                                            | 127                                                               | 385                                                                               |
| <i>R</i> <sub>1</sub> [ <i>I</i> > 2 $\sigma$ ( <i>I</i> )]  | 0.0167                                                            | 0.0544                                                                            |
| <i>wR</i> <sub>2</sub> [ <i>I</i> > 2 $\sigma$ ( <i>I</i> )] | 0.0410                                                            | 0.0837                                                                            |
| <i>R</i> <sub>1</sub> [all data]                             | 0.0187                                                            | 0.1321                                                                            |
| <i>wR</i> <sub>2</sub> [all data]                            | 0.0418                                                            | 0.1052                                                                            |
| GOF                                                          | 1.063                                                             | 1.002                                                                             |
| <i>R</i> <sub>int</sub>                                      | 0.0271                                                            | 0.1740                                                                            |

**Table 1(cont).** Crystal, intensity collection and refinement data.

|                                                | $\text{Cp}[\text{To}^{\text{MeBenz}}]\text{ZrCl}_2$                   | $[\text{CpCo}\{\text{P}(\text{O})(\text{OEt})_2\}_3]\text{-Re}(\text{CO})_3$ |
|------------------------------------------------|-----------------------------------------------------------------------|------------------------------------------------------------------------------|
| lattice                                        | Triclinic                                                             | Monoclinic                                                                   |
| formula                                        | $\text{C}_{35}\text{H}_{33}\text{BCl}_2\text{N}_6\text{O}_3\text{Zr}$ | $\text{C}_{20}\text{H}_{35}\text{CoO}_{12}\text{P}_3\text{Re}$               |
| formula weight                                 | 758.60                                                                | 805.52                                                                       |
| space group                                    | $P-1$                                                                 | $P2_1/n$                                                                     |
| $a/\text{\AA}$                                 | 10.0122(17)                                                           | 11.4131(7)                                                                   |
| $b/\text{\AA}$                                 | 12.326(2)                                                             | 18.4005(11)                                                                  |
| $c/\text{\AA}$                                 | 15.991(3)                                                             | 13.6761(8)                                                                   |
| $\alpha/^\circ$                                | 69.229(2)                                                             | 90                                                                           |
| $\beta/^\circ$                                 | 72.820(2)                                                             | 92.8560(10)                                                                  |
| $\gamma/^\circ$                                | 71.988(2)                                                             | 90                                                                           |
| $V/\text{\AA}^3$                               | 1716.0(5)                                                             | 2868.5(3)                                                                    |
| $Z$                                            | 2                                                                     | 4                                                                            |
| temperature (K)                                | 125(2)                                                                | 125(2)                                                                       |
| radiation ( $\lambda$ , $\text{\AA}$ )         | 0.71073                                                               | 0.71073                                                                      |
| $\rho$ (calcd.), $\text{g cm}^{-3}$            | 1.468                                                                 | 1.865                                                                        |
| $\mu$ (Mo $\text{K}\alpha$ ), $\text{mm}^{-1}$ | 0.521                                                                 | 5.018                                                                        |
| $\theta$ max, deg.                             | 30.61                                                                 | 32.48                                                                        |
| no. of data collected                          | 28027                                                                 | 48946                                                                        |
| no. of data used                               | 10491                                                                 | 10043                                                                        |
| no. of parameters                              | 439                                                                   | 341                                                                          |
| $R_1 [I > 2\sigma(I)]$                         | 0.0483                                                                | 0.0355                                                                       |
| $wR_2 [I > 2\sigma(I)]$                        | 0.0798                                                                | 0.0601                                                                       |
| $R_1$ [all data]                               | 0.0939                                                                | 0.0694                                                                       |
| $wR_2$ [all data]                              | 0.0922                                                                | 0.0686                                                                       |
| GOF                                            | 1.002                                                                 | 1.001                                                                        |
| $R_{\text{int}}$                               | 0.0722                                                                | 0.0705                                                                       |



**Table 1(cont).** Crystal, intensity collection and refinement data.

|                                          | [Tm <sup>MeBenz</sup> ]Na                                                                                    | [Tm <sup>MeBenz</sup> ]Re(CO) <sub>3</sub>                                      |
|------------------------------------------|--------------------------------------------------------------------------------------------------------------|---------------------------------------------------------------------------------|
| lattice                                  | Monoclinic                                                                                                   | Monoclinic                                                                      |
| formula                                  | C <sub>60</sub> H <sub>68</sub> B <sub>2</sub> N <sub>12</sub> Na <sub>2</sub> O <sub>3</sub> S <sub>6</sub> | C <sub>33</sub> H <sub>28</sub> BN <sub>6</sub> O <sub>3</sub> ReS <sub>3</sub> |
| formula weight                           | 1265.22                                                                                                      | 849.80                                                                          |
| space group                              | C2/c                                                                                                         | P2 <sub>1</sub> /c                                                              |
| <i>a</i> /Å                              | 34.381(13)                                                                                                   | 16.147(3)                                                                       |
| <i>b</i> /Å                              | 16.553(6)                                                                                                    | 10.510(2)                                                                       |
| <i>c</i> /Å                              | 11.073(4)                                                                                                    | 19.719(4)                                                                       |
| $\alpha$ /°                              | 90                                                                                                           | 90                                                                              |
| $\beta$ /°                               | 96.783(6)                                                                                                    | 93.087(3)                                                                       |
| $\gamma$ /°                              | 90                                                                                                           | 90                                                                              |
| <i>V</i> /Å <sup>3</sup>                 | 6257(4)                                                                                                      | 3341.5(12)                                                                      |
| <i>Z</i>                                 | 4                                                                                                            | 4                                                                               |
| temperature (K)                          | 125(2)                                                                                                       | 125(2)                                                                          |
| radiation ( $\lambda$ , Å)               | 0.71073                                                                                                      | 0.71073                                                                         |
| $\rho$ (calcd.), g cm <sup>-3</sup>      | 1.343                                                                                                        | 1.689                                                                           |
| $\mu$ (Mo K $\alpha$ ), mm <sup>-1</sup> | 0.288                                                                                                        | 3.868                                                                           |
| $\theta$ max, deg.                       | 30.55                                                                                                        | 32.75                                                                           |
| no. of data collected                    | 37010                                                                                                        | 56925                                                                           |
| no. of data used                         | 9564                                                                                                         | 11778                                                                           |
| no. of parameters                        | 392                                                                                                          | 431                                                                             |
| $R_1$ [ $I > 2\sigma(I)$ ]               | 0.0482                                                                                                       | 0.0311                                                                          |
| $wR_2$ [ $I > 2\sigma(I)$ ]              | 0.0990                                                                                                       | 0.0577                                                                          |
| $R_1$ [all data]                         | 0.1018                                                                                                       | 0.0516                                                                          |
| $wR_2$ [all data]                        | 0.1176                                                                                                       | 0.0635                                                                          |
| GOF                                      | 1.012                                                                                                        | 1.000                                                                           |
| $R_{\text{int}}$                         | 0.0796                                                                                                       | 0.0557                                                                          |

## REFERENCES

- (1) (a) McNally, J. P.; Leong, V. S.; Cooper, N. J. in *Experimental Organometallic Chemistry*, Wayda, A. L.; Darensbourg, M. Y., Eds.; American Chemical Society: Washington, DC, 1987; Chapter 2, pp 6-23.  
(b) Burger, B. J.; Bercaw, J. E. in *Experimental Organometallic Chemistry*; Wayda, A. L.; Darensbourg, M. Y., Eds.; American Chemical Society: Washington, DC, 1987; Chapter 4, pp 79-98.  
(c) Shriver, D. F.; Drezdson, M. A.; *The Manipulation of Air-Sensitive Compounds*, 2<sup>nd</sup> Edition; Wiley-Interscience: New York, 1986.
- (2) Gottlieb, H. E.; Kotlyar, V.; Nudelman, A. J. *Org. Chem.* **1997**, 62, 7512-7515.
- (3) Quast, H.; Nahr, U. *Chem. Ber.* **1984**, 117, 2761-2778.
- (4) Prakash, O.; Batra, H.; Kaur, H.; Sharma, P. K.; Sharma, V.; Singh, S. P.; Moriarty, R. M. *Synthesis* **2001**, 541-543.
- (5) (a) Sheldrick, G. M. SHELXTL, An Integrated System for Solving, Refining and Displaying Crystal Structures from Diffraction Data; University of Göttingen, Göttingen, Federal Republic of Germany, 1981.  
(b) Sheldrick, G. M. *Acta Cryst.* **2008**, A64, 112-122.
- (6) Müller, T. E.; Mingos, D. M. P. *Transition Met. Chem.* **1995**, 20, 533-539.
